# Supplementary material for: Effects of Drought, Pest Pressure and Light Availability on Seedling Establishment and Growth: Their Role for Distribution of Tree Species across a Tropical Rainfall Gradient
Source: PubMed Central journal article supplement (PMC4664389; doi:10.1371/journal.pone.0143955), 2015-11-30
Supplement: pone.0143955.s003.pdf [file pone.0143955.s003.pdf]

**S1 Table. Focal species, including their classification into dry or wet origin.**

| species                                                   | abbreviation | family<br>(-ceae) | origin | criteria for<br>classification |
|-----------------------------------------------------------|--------------|-------------------|--------|--------------------------------|
| <i>Aspidosperma spruceanum</i> Benth. ex Müll.<br>Arg.    | ASPISP       | Apocyna           | wet    | 1                              |
| <i>Bonellia macrocarpa</i> (Cav.) B. Ståhl &<br>Källersjö | BONEMA       | Primula           | dry    | 3                              |
| <i>Calophyllum longifolium</i> Willd.                     | CALOLO       | Calophylla        | wet    | 1                              |
| <i>Chamaedorea tepejilote</i> Liebm.                      | CHAMTE       | Areca             | wet    | 1                              |
| <i>Chrysophyllum argenteum</i> Jacq.                      | CHRYAR       | Sapota            | wet    | 1,2                            |
| <i>Chrysophyllum cainito</i> L.                           | CHRYCA       | Sapota            | dry    | 1,2                            |
| <i>Coussarea curvigemma</i> Dwyer                         | COUSCU       | Rubia             | dry    | 1                              |
| <i>Cupania rufescens</i> Triana & Planch.                 | CUPARU       | Sapinda           | dry    | 1                              |
| <i>Dipteryx oleifera</i> Benth.                           | DIPTOL       | Faba              | wet    | 1                              |
| <i>Enterolobium schomburgkii</i> (Benth.) Benth.          | ENTESC       | Faba              | dry    | 1                              |
| <i>Fissicalyx fendleri</i> Benth.                         | FISSFE       | Faba              | dry    | 1                              |
| <i>Genipa americana</i> L.                                | GENIAM       | Rubia             | dry    | 1,2                            |
| <i>Guatteria amplifolia</i> Triana & Planch.              | GUATAM       | Annona            | wet    | 1                              |
| <i>Guatteria dumetorum</i> R.E. Fr.                       | GUATDU       | Annona            | wet    | 1                              |
| <i>Inga goldmanii</i> Pittier                             | INGAGO       | Faba              | wet    | 1,2                            |
| <i>Inga marginata</i> Willd.                              | INGAMA       | Faba              | wet    | 1                              |
| <i>Lacmellea panamensis</i> (Woodson) Markgr.             | LACMPA       | Apocyna           | wet    | 1                              |
| <i>Lafoensia punicifolia</i> DC.                          | LAFOPU       | Lythra            | dry    | 1                              |
| <i>Mouriri myrtilloides</i> (Sw.) Poir.                   | MOURMY       | Melastomata       | wet    | 1                              |
| <i>Platymiscium pinnatum</i> (Jacq.) Dugand               | PLATPI       | Faba              | wet    | 1                              |
| <i>Prioria copaifera</i> Griseb.                          | PRIOCO       | Faba              | wet    | 1                              |
| <i>Sterculia apetala</i> (Jacq.) H. Karst.                | STERAP       | Malva             | dry    | 1                              |
| <i>Swartzia simplex</i> (Sw.) Spreng.                     | SWARSI       | Faba              | dry    | 1                              |
| <i>Tabernaemontana arborea</i> Rose                       | TABEAR       | Apocyna           | wet    | 1                              |
| <i>Trichilia hirta</i> L.                                 | TRICHI       | Melia             | dry    | 1                              |
| <i>Unonopsis pittieri</i> Saff.                           | UNONPI       | Annona            | wet    | 3                              |

Criteria used:

1: occurrence maps according to CTFS [42], available at

<http://ctfs.arnarb.harvard.edu/webatlas/maintreeatlas.php>

2: abundance data according to CTFS [42], available at

<http://ctfs.arnarb.harvard.edu/webatlas/datasets/>

3: description of the species according to CTFS [42]
